# Supplementary material for: PP2A and GSK3 act as modifiers of FUS-ALS by modulating mitochondrial transport
Source: Springer Nature journal article supplement (doi:10.1007/s00401-024-02689-y), 2024-02-16
Supplement: MOESM1 [file 26741296]

**Supplementary material to:**

**PP2A and GSK3 act as modifiers of FUS-ALS by modulating mitochondrial transport**

Paraskevi Tziortzouda<sup>1,2</sup>, Jolien Steyaert<sup>1,2</sup>, Wendy Scheveneels<sup>1,2</sup>, Adria Sicart<sup>1,2</sup>, Katarina Stoklund Dittlau<sup>1,2</sup>, Adriana Margarida Barbosa Correia<sup>1,2,3</sup>, Thibaut Burg<sup>1,2</sup>, Arun Pal<sup>4,5</sup>, Andreas Hermann<sup>5,6,7,8</sup>, Philip Van Damme<sup>1,2,9</sup>, Thomas G Moens<sup>1,2,\*</sup> & Ludo Van Den Bosch<sup>1,2,\*</sup>

<sup>1</sup>Department of Neurosciences, Experimental Neurology and Leuven Brain Institute (LBI), KU Leuven - University of Leuven, Leuven, Belgium

<sup>2</sup>Center for Brain & Disease Research, Laboratory of Neurobiology, VIB, Campus Gasthuisberg, O&N5, Herestraat 49, PB 602, 3000 Leuven, Belgium

<sup>3</sup>Instituto Superior Técnico - Universidade de Lisboa, Av. Rovisco Pais, 1049-001 Lisboa, Portugal

<sup>4</sup>Dresden High Magnetic Field Laboratory (HLD-EMFL), Helmholtz-Zentrum Dresden Rossendorf, D-01328 Dresden, Germany

<sup>5</sup>Division of Neurodegenerative Diseases, Department of Neurology, Technische Universität Dresden, D-01307, Dresden, Germany

<sup>6</sup>Translational Neurodegeneration Section “Albrecht Kossel”, Department of Neurology, University Medical Center Rostock, University of Rostock, D-18147 Rostock, Germany

<sup>7</sup>Deutsches Zentrum für Neurodegenerative Erkrankungen (DZNE) Rostock/Greifswald, D-18147, Rostock, Germany

<sup>8</sup>Center for Transdisciplinary Neurosciences Rostock (CTNR), University Medical Center Rostock, University of Rostock, D-18147, Rostock, Germany

<sup>9</sup>Department of Neurology, University Hospitals Leuven, Leuven, Belgium

\*Corresponding authors

Thomas G Moens, [thomas.moens@kuleuven.be](mailto:thomas.moens@kuleuven.be), TEL: +32 16 33 06 81, FAX: +32 16 37 25 34

Ludo Van Den Bosch, [ludo.vandenbosch@kuleuven.be](mailto:ludo.vandenbosch@kuleuven.be), TEL: +32 16 33 06 81, FAX: +32 16 37 25 34

## Supplementary Figures and Tables

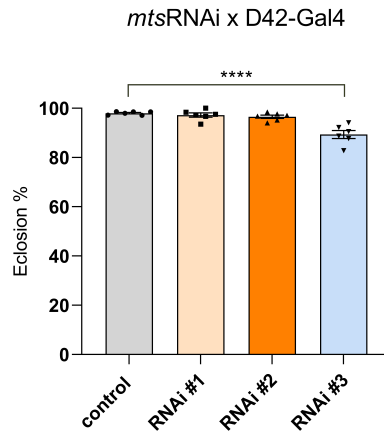

**Fig. S1** *mts* RNAi line #3 leads to a lower eclosion percentage due to inherent toxicity. *mts* RNAi lines shown in Fig. 1c were crossed to the D42-Gal4 driver line without FUS expression and eclosion was assessed. Knockdown of *mts* using line #3 causes a significant reduction in eclosion. (N=6 crosses/condition) Statistical comparisons between control and RNAi conditions were determined using one-way ANOVA with Sidak's multiple comparisons test. \*\*\*\*p< 0.0001

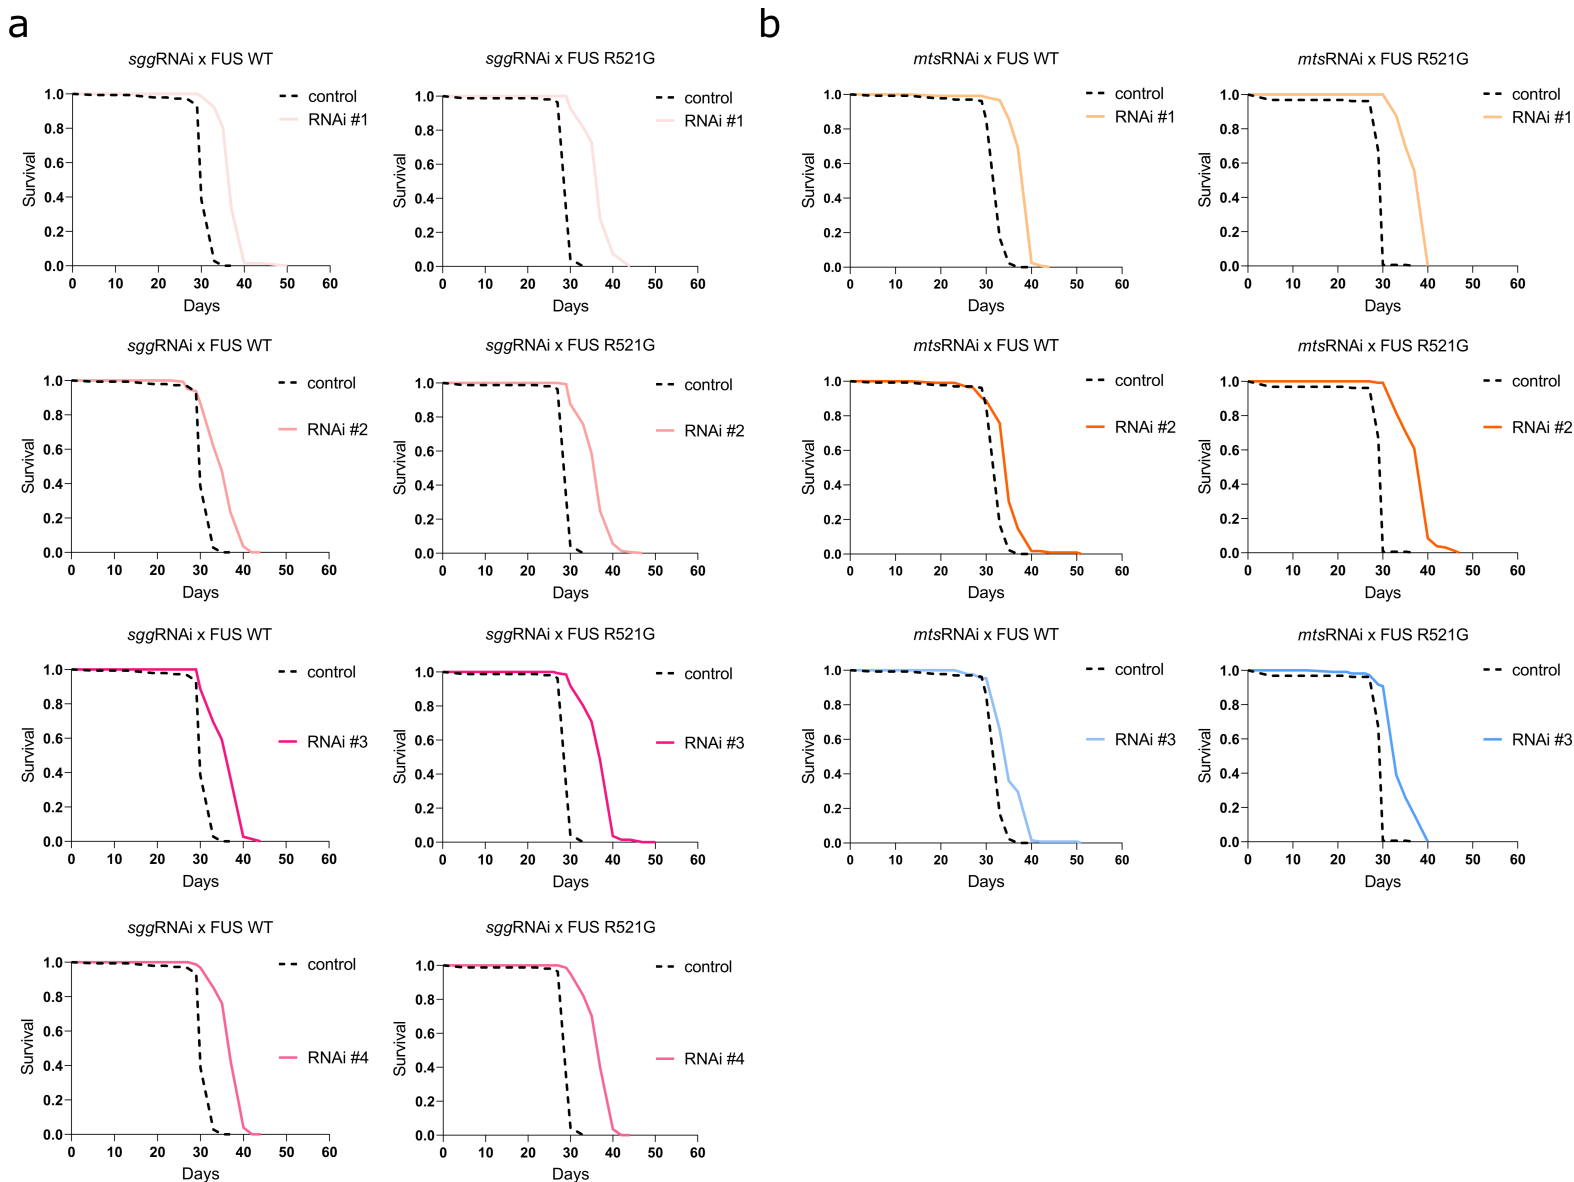

**Fig. S2** *sgg* and *mts* inhibition extend the lifespan of the FUS fly. **a.** Detailed graphs presenting the extension of the lifespan that each *sgg* RNAi line induces. The dashed line indicates the healthy control and the colored line indicates the respective *sgg* RNAi line. **b.** Detailed graphs presenting the extension of the lifespan that each *mts* RNAi line induces. The dashed line indicates the healthy control and the colored line indicates the respective *mts* RNAi line. (log-rank tests, see Table S2 for statistical information)



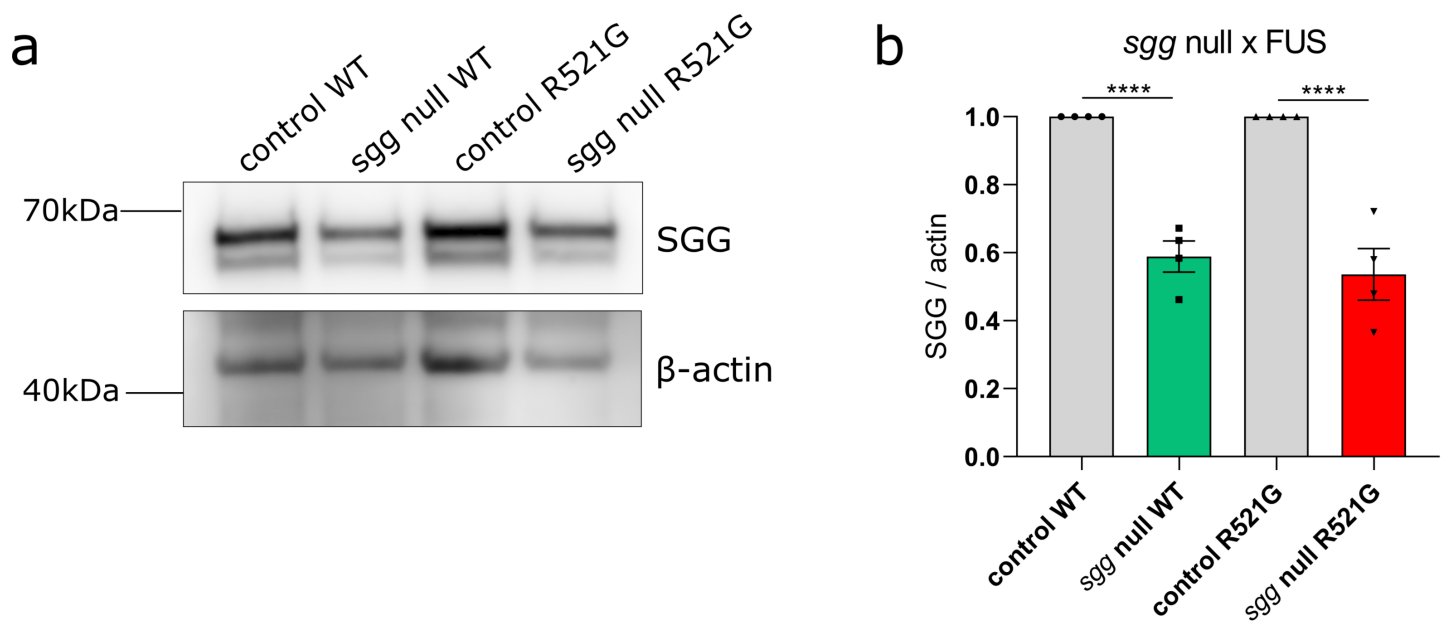

**Fig. S3 *sgg* null mutant reduces the levels of *sgg* protein by ~50%.** **a.** Western blot for *sgg* protein levels in *sgg* null mutant line. Beta-actin serves as loading control. (N=3) **b.** Quantification of panel a shows that the *sgg* null mutant line induces ~50% reduction of *sgg* protein levels. (N=3, mean  $\pm$  SEM, one-way ANOVA with Sidak's multiple comparisons test) \*\*\*\* $p < 0.0001$

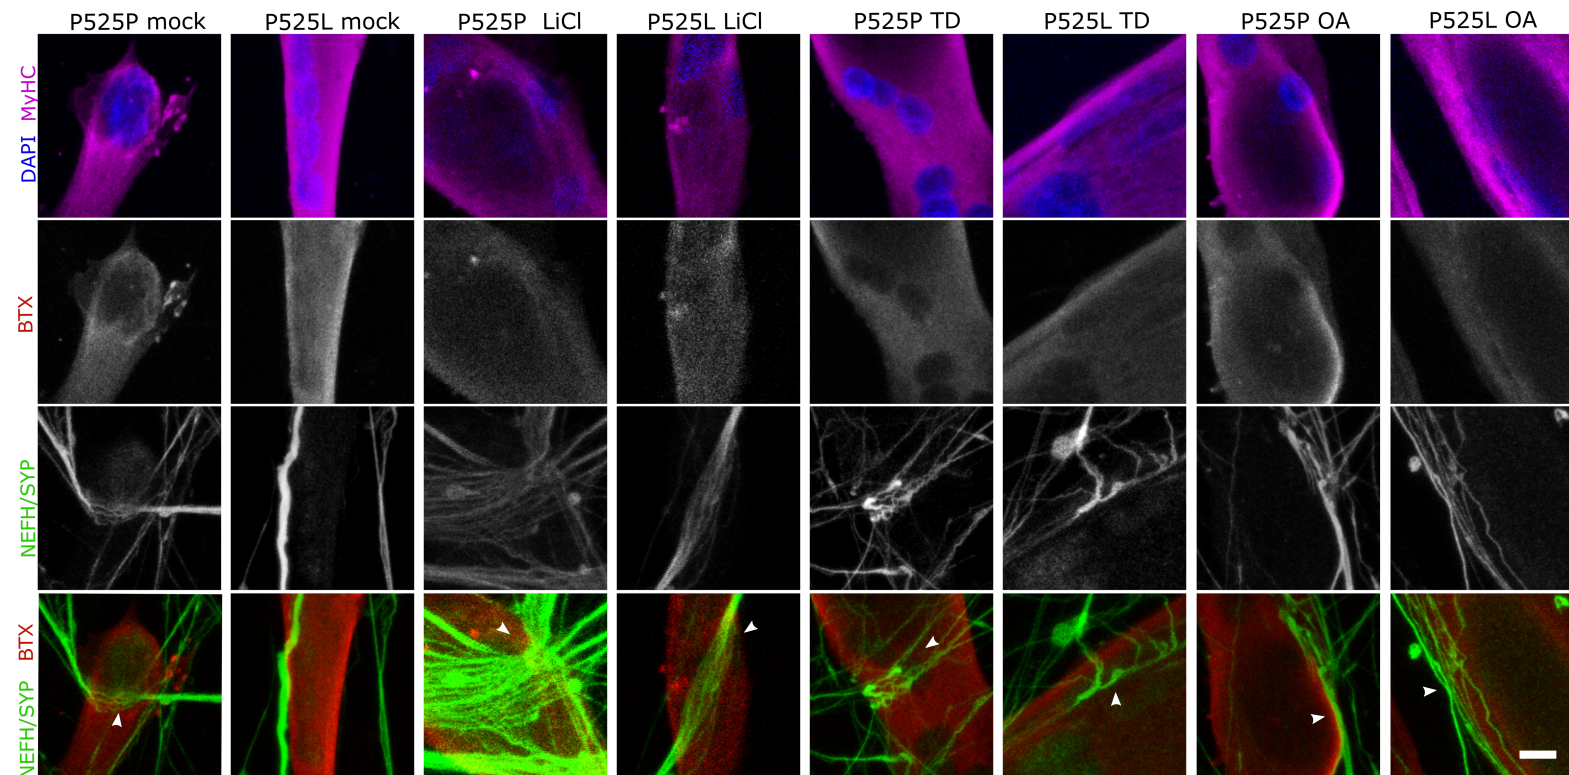

**Fig. S4 PP2A and GSK3 inhibition improve FUS-induced NMJ impairments.** Additional representative images of all the conditions with and without pharmacological treatments. The quantification of the NMJ-like structures is based on the neurite/presynaptic marker morphology and/or on Btx (red)-SYP/NEFH (green) co-localization per myotube. The DAPI and myosin (MyHC) channels are merged, demonstrating the multi-nucleated myoblast, while the bungarotoxin and synaptophysin channels are presented alone, and finally merged to indicate the formation of the NMJ. Scale bar = 10 $\mu$ m

**a**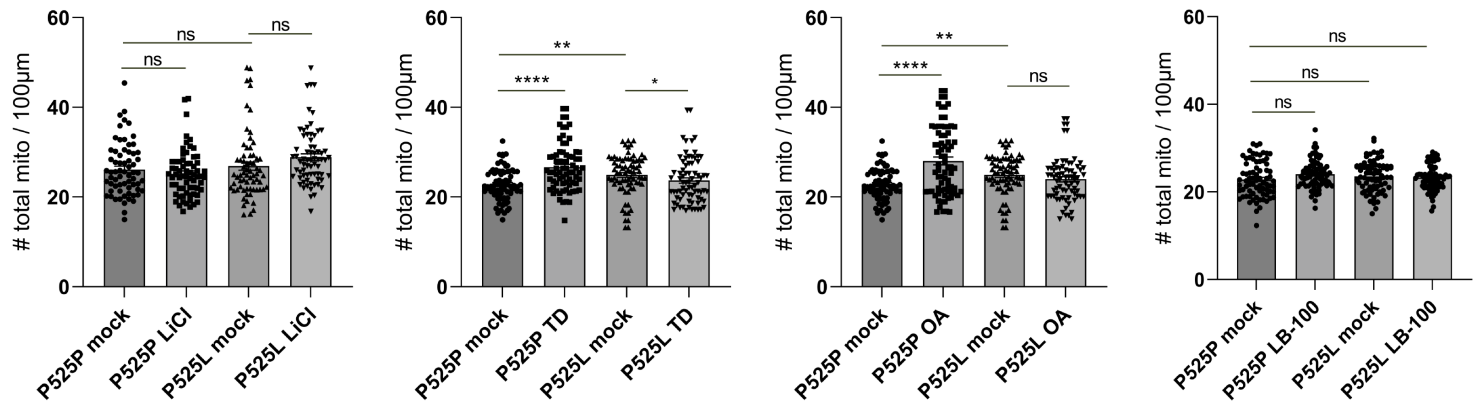**b**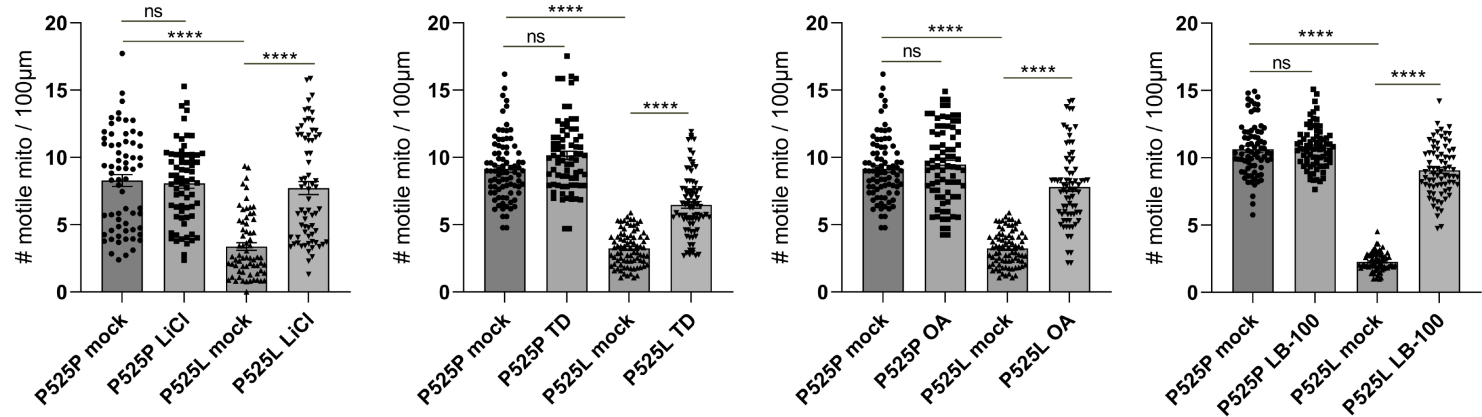**c**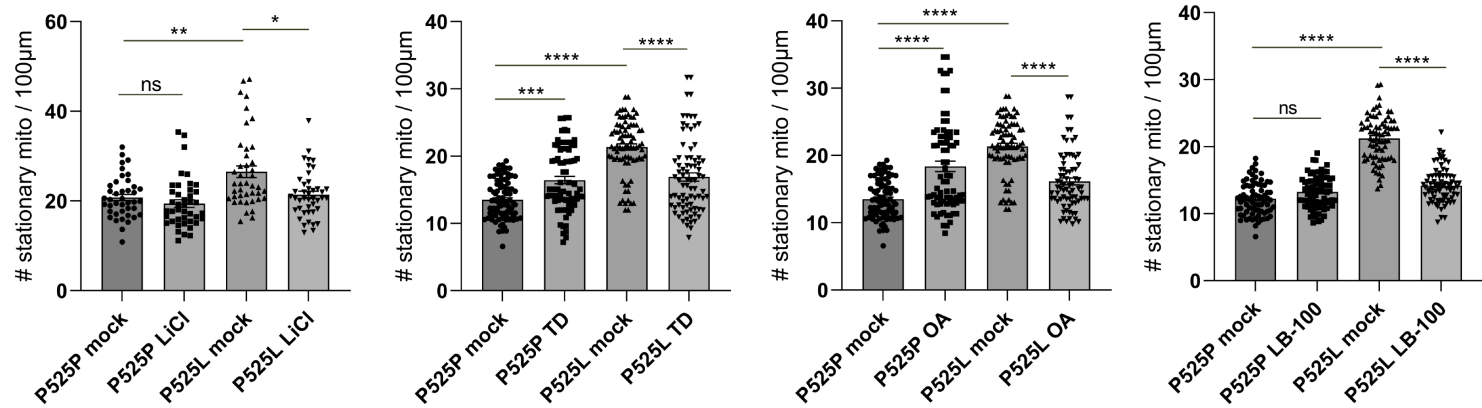

**Fig. S5 Additional data on the effect of LiCl, TD, OA and LB-100 on mitochondrial transport in sMNs. a to c.** Quantification of total (a), motile (b) and stationary (c) mitochondria normalized to 100µm neurite length. Total mitochondria are calculated as the sum of motile and stationary events. Data are represented as mean  $\pm$  SEM, N=3 independent differentiations, Kruskal-Wallis with Dunn's multiple comparisons test. \*\*\*\* $p$ < 0.0001, \*\*\* $p$ < 0.001, \*\* $p$ < 0.01, \* $p$ < 0.05, ns= not significant

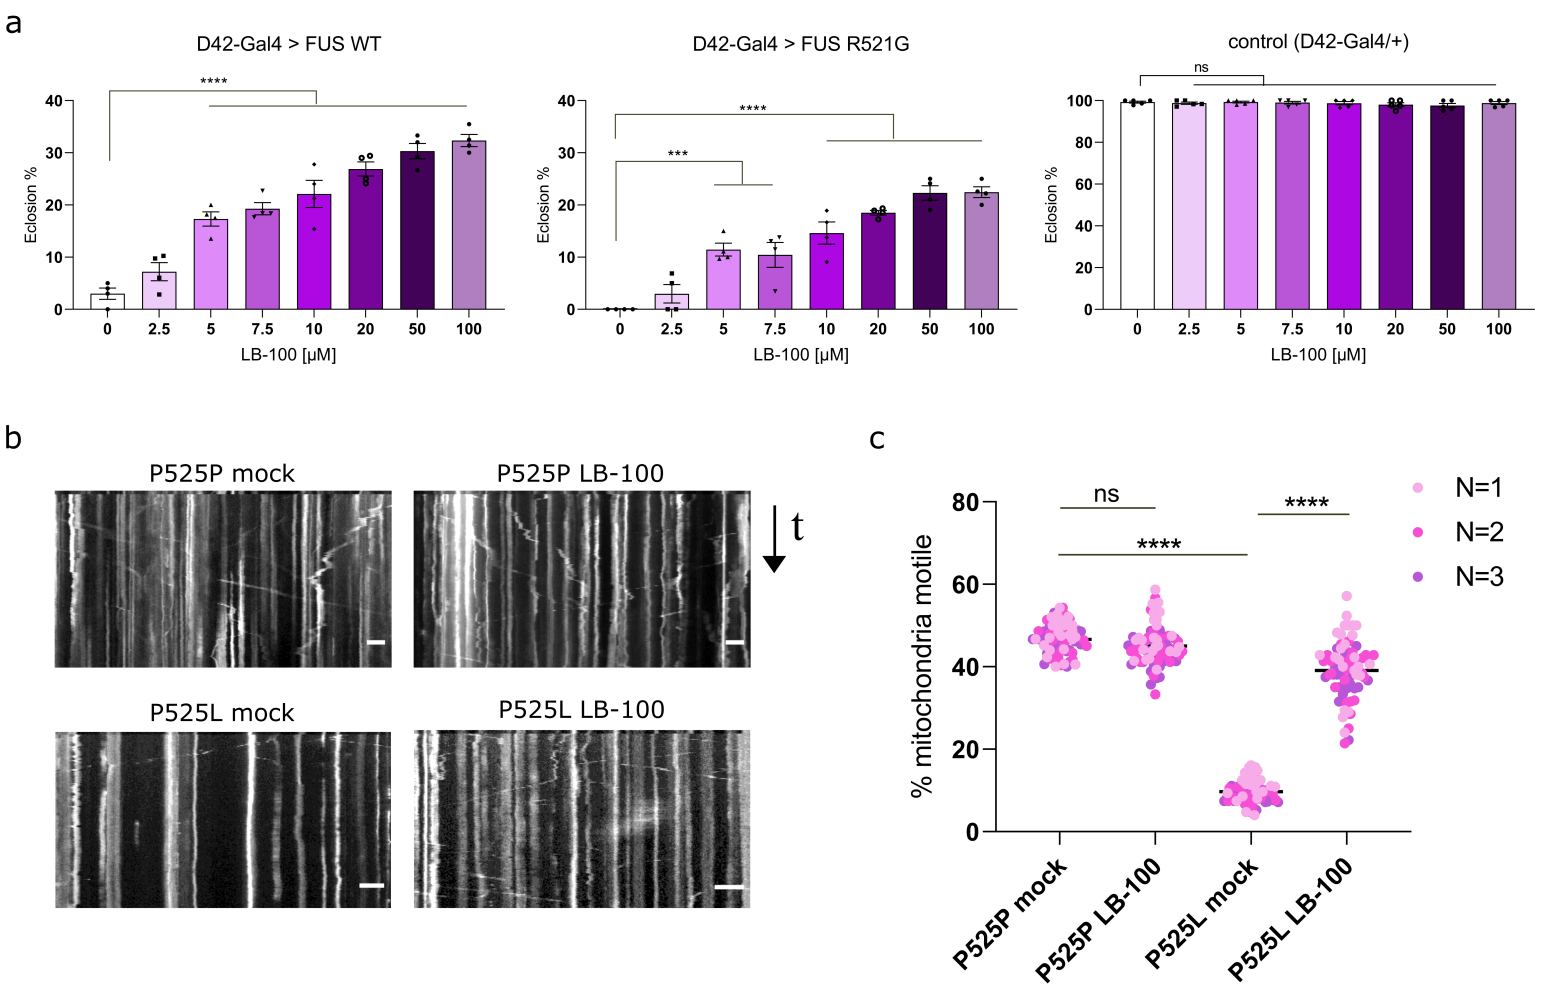

**Fig. S6 PP2A pharmacological inhibition by LB-100 rescues phenotypes in FUS flies and patient iPSC-derived motor neurons.** **a.** Pharmacological inhibition of PP2A by LB-100 rescues the eclosion phenotype in FUS flies. D42-Gal4/+ serves as a control. (N=4 or N=5 crosses/condition). Statistical comparisons between untreated and treated conditions were determined using one-way ANOVA with Sidak's multiple comparisons. \*\*\*\* $p < 0.0001$ , \*\*\* $p < 0.001$ , ns = not significant **b.** Example kymographs (time-distance plots) of mitochondria (MitoTracker Green) after treatment of 30-day old P525P isogenic control and P525L mutant motor neurons with  $1\mu$ M LB-100 for 48h. Scale bars  $30\mu$ m **c.** Percentage of mitochondria that are motile in the motor neurons (day30) comparing isogenic control and mutant with or without LB-100. Data shown as Grand Mean; N=3 differentiations; Kruskal-Wallis with Dunn's multiple comparisons test. \*\*\*\* $p < 0.0001$ , ns = not significant

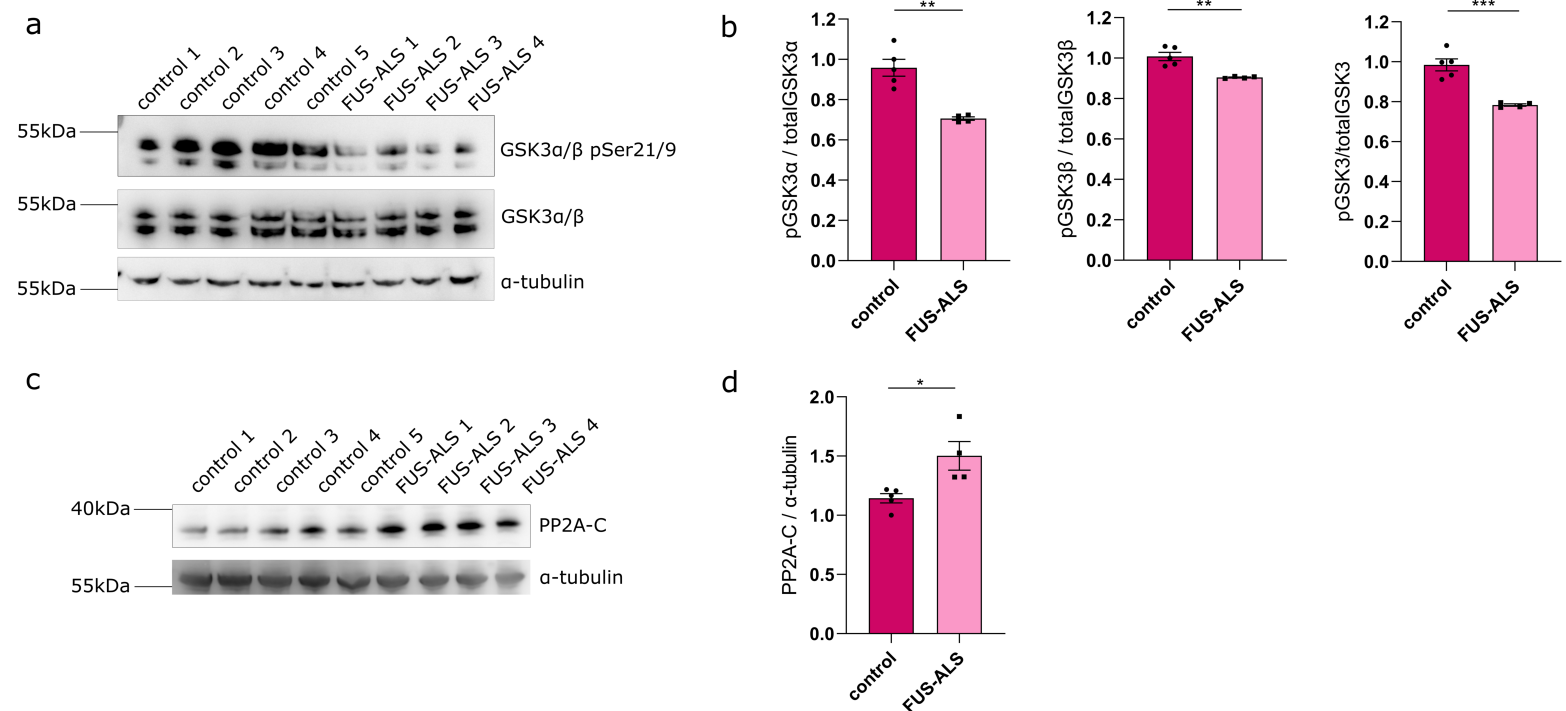

**Fig. S7 GSK3 is hyperactive in a FUS-ALS mouse model due to reduced inhibitory phosphorylation.** **a.** Western blot for GSK3 $\alpha/\beta$  pSer21/9 in the spinal cord of 4 FUS mice and 5 healthy controls. Ser21/9 inhibitory phosphorylation of GSK3 $\alpha/\beta$  appears reduced in the FUS mice compared to control mice, while the total levels of GSK3 $\alpha/\beta$  remain unaltered. Alpha-tubulin serves as a loading control. **b.** Quantification of the western blot of panel a shows reduced Ser21 and Ser9 inhibitory phosphorylation for GSK3  $\alpha$  and  $\beta$  respectively. **c.** Western blot for PP2A-C in the spinal cord of 4 FUS mice and 5 healthy controls. PP2A-C appears increased in the FUS mice compared to control mice. Alpha-tubulin serves as a loading control **d.** Quantification of the western blot of panel c shows increased PP2A-C in FUS mice. Mean  $\pm$  SEM, unpaired t-test, \* $p < 0.05$ , \*\* $p < 0.01$ , \*\*\* $p < 0.001$

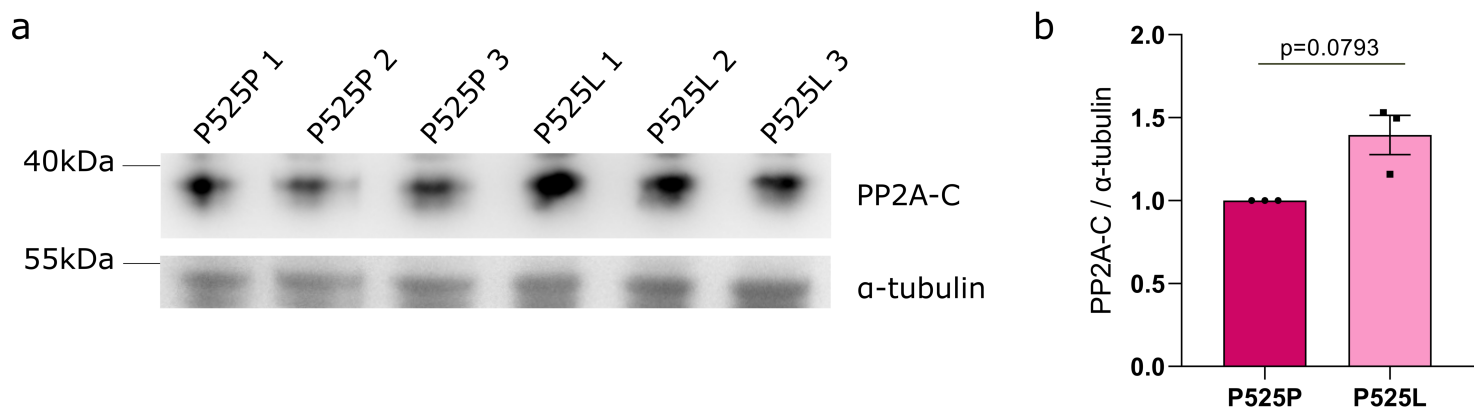

**Fig. S8 PP2A-C is elevated in FUS patient iPSC-derived motor neurons.** **a.** Western blot for PP2A-C in FUS iPSC-derived motor neurons from FUS-P525L patients and in their CRISPR-corrected P525P isogenic controls. The numbers 1, 2 and 3 represent three independent differentiations. Alpha-tubulin serves as a loading control. **b.** Quantification of the western blot of panel a shows increased PP2A-C protein levels in P525L mutant motor neurons. (N=3, mean  $\pm$  SEM, two-tailed paired t-test)  $p = 0.0793$

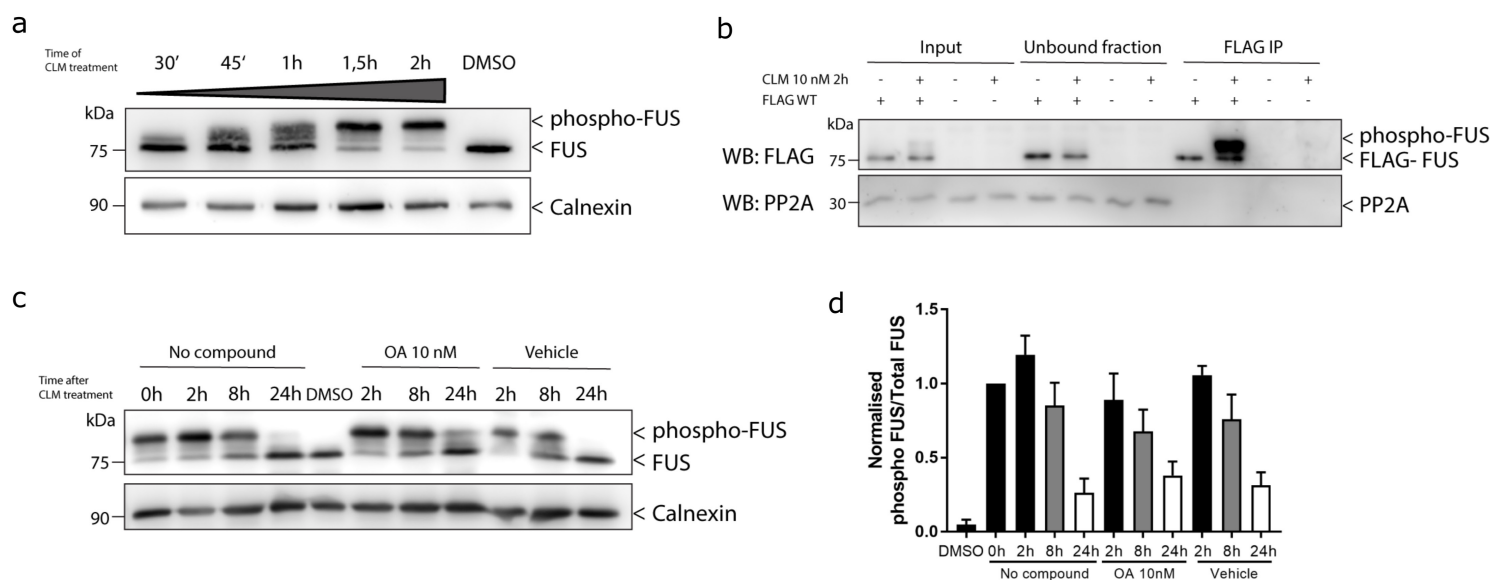

**Fig. S9 PP2A is an upstream suppressor of FUS toxicity.** **a.** FUS phosphorylation by 10nM CLM treatment is examined at different time points. After 45 min of CLM treatment, phospho-FUS was observed and after 2 h of CLM treatment, endogenous FUS was almost completely phosphorylated. **b.** Lysates from FLAG-WT hFUS-expressing HEK293T cells treated with 10nM CLM were immunoprecipitated using an anti-FLAG antibody. No interaction between FUS and PP2A was observed. **c.** HEK293T cells treated with 10nM CLM showed almost complete dephosphorylation after 24 h (no compound). PP2A inhibition with 10nM OA could not affect the dephosphorylation rates of FUS. **d.** Quantification of the western blot of panel c.



**Table S1: Overview of the candidate modifiers that resulted from the genetic screen.**

|                   | Modifying gene | CG number | Human orthologue | Rescue               |                    | RNAi lines tested | RNAi lines positive | Null Mutants         |                   | Null mutants tested | Null mutants positive |
|-------------------|----------------|-----------|------------------|----------------------|--------------------|-------------------|---------------------|----------------------|-------------------|---------------------|-----------------------|
|                   |                |           |                  | Female D42/R521G (%) | Male D42/R521G (%) |                   |                     | Female D42/R521G (%) | Male D42/R521G(%) |                     |                       |
| Unbiased approach | NaCh           | CG8178    | SCNN1G           | 9                    | -                  | 1                 | 1                   |                      |                   |                     |                       |
|                   | CG34458        | CG34458   | CSTG             | -                    | 4                  | 1                 | 1                   |                      |                   |                     |                       |
|                   | Herp           | CG14536   | HERPUD2          | 1                    | 3                  | 2                 | 2                   | -                    | -                 | 2                   | 0                     |
|                   | Mts            | CG7109    | PPP2CA           | 8                    | 1                  | 1                 | 1                   | 12                   | 0                 | 4                   | 2                     |
|                   | CG7231         | CG7231    | FAM151B          | 0                    | 3                  | 2                 | 1                   | 7                    | 0                 | 2                   | 1                     |
|                   | Sirup          | CG7224    | SDHAF4           | 5                    | 2                  | 1                 | 1                   | 1                    | 0                 | 1                   | 0                     |
|                   | R2d2           | CG7138    | STAU2            | 4                    | 4                  | 2                 | 1                   | 4                    | 0                 | 2                   | 1                     |
|                   | SmE            | CG18591   | SNRPE            | 5                    | 5                  | 2                 | 1                   | 4                    | 0                 | 1                   | 1                     |
|                   | CG31915        | CG31915   | COLGALT1         | 1                    | 0                  | 2                 | 1                   | 85                   | 40                | 1                   | 1                     |
|                   | CG7277         | CG7277    | COQ6             | 0                    | 7                  | 1                 | 1                   | 22                   | 0                 | 1                   | 1                     |
|                   | qkr54B         | CG4816    | KHDRBS1          | 1                    | -                  | 2                 | 1                   | 55                   | 27                | 1                   | 1                     |
|                   | NT5E-2         | CG30104   | NTE              | 1,4                  | -                  | 2                 | 1                   |                      |                   | 2                   | 0                     |
|                   | Patronin       | CG33130   | CAMSAP2          | 13                   | 13                 | 2                 | 1                   | 17                   | 4                 | 3                   | 1                     |
|                   | CG6568         | CG6568    | unknown          | 1                    | -                  | 1                 | 1                   | 3                    | 2                 | 1                   | 1                     |
|                   | I(2)k01209     | CG4798    | UCKL1            | 3                    | -                  | 1                 | 1                   | -                    | -                 | 3                   | 0                     |
|                   | CG18467        | CG18467   | GID8             | 2                    | -                  | 1                 | 1                   |                      |                   |                     |                       |
|                   | FMR1           | CG6203    | FMR1             | 3                    | 3                  | 5                 | 3                   | 5                    | 6                 | 2                   | 2                     |
| Sgg               | CG2621         | GSK3B     | 63               | 45                   | 5                  | 2                 | 7                   | -                    | 3                 | 1                   |                       |
| Literature        | HRB87F         | CG12749   | HNRNPA2B1        | 2                    | -                  | 1                 | 1                   | 4                    | -                 | 1                   | 1                     |
|                   | HRB27C         | CG10377   | DAZAP1           | 3                    | 6                  | 2                 | 2                   | 50                   | 64                | 2                   | 1                     |
|                   | Parp           | CG40411   | PARP1            | 17                   | 4                  | 2                 | 1                   |                      |                   |                     |                       |
|                   | Sgg            | CG2621    | GSK3B            | 63                   | 45                 | 5                 | 2                   | 7                    | -                 | 3                   | 1                     |
|                   | qkr54B         | CG4816    | KHDRBS1          | 1                    | -                  | 2                 | 1                   | 55                   | 27                | 1                   | 1                     |
|                   | FMR1           | CG6203    | FMR1             | 3                    | 3                  | 5                 | 3                   | 5                    | 6                 | 2                   | 2                     |

**Table S2: The statistical information of the RNAi lifespans (from Fig.2).**

|               | Experiment | Condition | N<br>(number of flies) | Median lifespan<br>(days) | P value     |
|---------------|------------|-----------|------------------------|---------------------------|-------------|
| sggRNAi x FUS | WT FUS     | control   | 152                    | 29.5                      | -           |
|               |            | RNAi #1   | 149                    | 36.0                      | 5.24807E-58 |
|               |            | RNAi #2   | 151                    | 34.0                      | 3.62347E-30 |
|               |            | RNAi #3   | 155                    | 36.0                      | 5.57358E-39 |
|               |            | RNAi #4   | 156                    | 36.0                      | 2.92332E-54 |
|               | R521G FUS  | control   | 160                    | 28.0                      | -           |
|               |            | RNAi #1   | 148                    | 36.0                      | 3.37108E-64 |
|               |            | RNAi #2   | 149                    | 36.0                      | 4.90037E-60 |
|               |            | RNAi #3   | 148                    | 36.0                      | 1.99196E-60 |
|               |            | RNAi #4   | 146                    | 36.0                      | 6.91336E-65 |
| mtsRNAi x FUS | WT FUS     | control   | 142                    | 31.5                      | -           |
|               |            | RNAi #1   | 134                    | 38.5                      | 3.00091E-48 |
|               |            | RNAi #2   | 126                    | 34.0                      | 3.87413E-17 |
|               |            | RNAi #3   | 139                    | 34.0                      | 1.09269E-18 |
|               | R521G FUS  | control   | 158                    | 29.5                      | -           |
|               |            | RNAi #1   | 128                    | 38.5                      | 1.05996E-52 |
|               |            | RNAi #2   | 139                    | 38.5                      | 1.50108E-56 |
|               |            | RNAi #3   | 128                    | 31.5                      | 3.0097E-38  |

**Table S3: The statistical information of the null mutant lifespans (from Fig.2).**

|                | Experiment | Condition | N<br>(number of flies) | Median lifespan<br>(days) | P value     |
|----------------|------------|-----------|------------------------|---------------------------|-------------|
| sgg null x FUS | WT FUS     | control   | 137                    | 31.5                      | -           |
|                |            | sgg null  | 145                    | 52.5                      | 1.83106E-58 |
|                | R521G FUS  | control   | 138                    | 35.0                      | -           |
|                |            | sgg null  | 142                    | 48.0                      | 4.03951E-52 |
| mts null x FUS | WT FUS     | control   | 137                    | 31.5                      | -           |
|                |            | mts null  | 140                    | 41.0                      | 6.4319E-26  |
|                | R521G FUS  | control   | 138                    | 35.0                      | -           |
|                |            | mts null  | 150                    | 38.5                      | 6.63065E-15 |

**Table S4: The statistical information of p[Khc+] lifespans (from Fig.8).**

|               | Experiment | Condition | N<br>(number of flies) | Median lifespan<br>(days) | P value     |
|---------------|------------|-----------|------------------------|---------------------------|-------------|
| p[Khc+] x FUS | WT FUS     | control   | 144                    | 36.0                      | -           |
|               |            | p[Khc+]   | 123                    | 51.0                      | 5.76056E-26 |
|               | R521G FUS  | control   | 145                    | 30.5                      | -           |
|               |            | p[Khc+]   | 137                    | 48.5                      | 2.01433E-51 |

**Table S5: Primary antibody overview.**

| Antibody                                                  | Dilution | Company                       | Application | Cat No        |
|-----------------------------------------------------------|----------|-------------------------------|-------------|---------------|
| Rabbit anti-FUS                                           | 1:1000   | Bethyl Laboratories           | WB          | A300-293AM    |
| Mouse anti-beta Actin                                     | 1:1000   | Abcam                         | WB          | ab8224        |
| Rabbit FUS/TLS Polyclonal                                 | 1:500    | Proteintech                   | ICC         | 11570-1-AP    |
| Goat anti-Choline Acetyltransferase (ChAT)                | 1:500    | Sigma-Aldrich                 | ICC         | AB144P        |
| Mouse anti-beta III Tubulin antibody                      | 1:500    | Abcam                         | ICC         | ab7751        |
| Rabbit anti-Neurofilament heavy polypeptide (NEFH)        | 1:1000   | Abcam                         | ICC         | ab8135        |
| Rabbit anti-synaptophysin (SYP)                           | 1:1000   | Cell Signaling                | ICC         | 5461S         |
| Mouse anti-myosin heavy chain (MyHC)                      | 1:20     | In house, SCIL                | ICC         | -             |
| Rabbit phospho-GSK-3 $\alpha/\beta$ (Ser21/9)             | 1:500    | Cell Signaling                | WB          | 9331S         |
| Mouse Anti-Glycogen Synthase Kinase 3 (GSK3) (Drosophila) | 1:500    | US Biological                 | WB          | G8170-40      |
| Mouse anti- $\alpha$ -Tubulin                             | 1:5000   | Sigma Aldrich                 | WB          | T6199         |
| Mouse anti-Kinesin Antibody, light chain                  | 1:500    | Sigma Aldrich                 | WB          | MAB1617       |
| Mouse kinesin heavy chain, head region (SUK4)             | 1:500    | DSHB                          | WB          | AB_528326     |
| Rabbit Anti-KLC1 S460p                                    | 1:500    | In house, Chris Miller lab    | WB          | -             |
| Rabbit Calnexin                                           | 1:2000   | Enzo Life Sc                  | WB          | ADI-SPA-860-D |
| Mouse anti-PP2A-C                                         | 1:1000   | In house, Veerle Janssens lab | WB          | -             |



**Table S6: Secondary antibody overview.**

| Antibody                                                      | Dilution | Company                  | Application | Cat No     |
|---------------------------------------------------------------|----------|--------------------------|-------------|------------|
| Alexa Flour <sup>TM</sup> IgG (H+L) 488<br>donkey-anti-rabbit | 1:1000   | Thermo Fisher Scientific | ICC         | AB_2535792 |
| Alexa Flour <sup>TM</sup> IgG (H+L) 555<br>donkey-anti-goat   | 1:1000   | Thermo Fisher Scientific | ICC         | AB_2535853 |
| Alexa Flour <sup>TM</sup> IgG (H+L) 647<br>donkey-anti-mouse  | 1:1000   | Thermo Fisher Scientific | ICC         | AB_162542  |
| $\alpha$ -bungarotoxin (Btx) Alexa<br>Flour <sup>TM</sup> 555 | 1:1000   | Thermo Fisher Scientific | ICC         | AB_2617152 |
| Goat anti-Mouse IgG (H+L)<br>Secondary Antibody, HRP          | 1:1000   | Thermo Fisher Scientific | WB          | 62-6520    |
| Goat anti-Rabbit IgG (H+L)<br>Secondary Antibody, HRP         | 1:1000   | Thermo Fisher Scientific | WB          | 31460      |
